# Supplementary material for: Preferential Genome Targeting of the CBP Co-Activator by Rel and Smad Proteins in Early Drosophila melanogaster Embryos
Source: PLoS Genet. 2012 Jun 21;8(6):e1002769. doi: 10.1371/journal.pgen.1002769 (PMC3380834; doi:10.1371/journal.pgen.1002769)
Supplement: Table S6 — Binding of CBP, Dorsal, and indicated histone modifications at Dorsal target genes, expressed as fold over background. ChIP was performed on 2 to 4 hour old wt, gd7, Tollrm9/rm10, and Toll10B embryos. qPCR values were compared to input, and then normalized to two intergenic sites with background levels of binding. For histone antibodies, values were further normalized to total amount of histone H3. Values represent the average and standard deviation of the indicated number of independent ChIP experiments. (XLSX) [file pgen.1002769.s010.xlsx]

## Sheet: Blad1
Binding of CBP, Dorsal, and histone modifications at Dorsal target genes, expressed as fold over background. ChIP qPCR values were compared to input, and then normalized to two intergenic sites with background levels of binding. For histone antibodies, values were further normalized to total amount of histone H3.
	twi	w	gd7	Tollrm9/10	Toll10B		sna	w	gd7	Tollrm9/10	Toll10B		tld	w	gd7	Tollrm9/10	Toll10B		zen	w	gd7	Tollrm9/10	Toll10B
average	CBP	3.40421	2.60303	3.57798	6.21465		CBP	5.70546	5.69428	9.00054	6.54273		CBP	3.35069	6.34138	7.82048	2.91596		CBP	4.38396	10.1004	6.90741	4.01875
	dl	3.48445	1.05651	1.77	5.42912		dl	6.96455	1.6048	4.02893	10.1713		dl	3.06508	1.89526	2.76272	3.83441		dl	3.38419	2.25571	4.62497	3.58529
	H3K18ac	3.22451	2.56129	1.70648	4.51835		H3K18ac	5.27072	5.00406	5.5401	5.32064		H3K18ac	2.579	5.12935	3.27263	2.36032		H3K18ac	4.42411	6.52587	3.32394	4.39373
	H3K9ac	2.67651	1.78809	1.17966	4.88759		H3K9ac	4.41167	2.50336	2.97806	4.09312		H3K9ac	2.87857	4.58868	2.14661	2.42832		H3K9ac	4.23987	4.93919	2.385	3.81096
	H3K27ac	2.83035	1.89823	1.32563	4.47765		H3K27ac	3.4254	1.74687	2.68982	5.48637		H3K27ac	2.64701	4.36751	2.38484	2.02063		H3K27ac	3.62997	4.889	2.11028	3.03914
	H4ac	3.02834	1.71903	0.910709	5.2594		H4ac	4.19407	2.66195	3.41219	5.95401		H4ac	2.70196	4.56618	2.58509	3.19328		H4ac	4.23252	9.30866	2.45911	5.15534
	H3K27me3	9.00071	15.2076	9.64483	2.02446		H3K27me3	8.43645	16.1896	8.86564	3.13984		H3K27me3	2.30712	2.83392	4.9454	3.02345		H3K27me3	10.1671	8.69641	12.8549	6.19368
	H3K9me3	3.57235	3.16229	2.16872	1.56153		H3K9me3	2.61915	2.85207	2.24296	2.04833		H3K9me3	1.05232	0.913108	1.78074	1.49957		H3K9me3	2.65856	1.61861	2.57595	2.02986
	twi	w	gd7	Tollrm9/10	Toll10B		sna	w	gd7	Tollrm9/10	Toll10B		tld	w	gd7	Tollrm9/10	Toll10B		zen	w	gd7	Tollrm9/10	Toll10B
st dev	CBP	2.05824	0.765526	0.984277	1.90266		CBP	4.93041	3.26775	3.11884	2.57804		CBP	1.92692	3.31009	3.50397	0.678872		CBP	2.72272	6.91307	2.59577	1.81362
	dl	1.18044	0.409338	0.0254011	6.78292		dl	1.85318	0.519175	0.595522	7.88237		dl	1.89127	1.03629	0.193811	3.54475		dl	1.27326	1.00263	0.438412	2.96554
	H3K18ac	0.814925	1.09324	0.149696	2.48143		H3K18ac	1.60321	1.59348	0.410817	1.37619		H3K18ac	0.687827	2.35496	0.0409579	0.872036		H3K18ac	1.36685	2.17986	0.145166	1.98528
	H3K9ac	1.06269	0.449753	0.527112	4.00863		H3K9ac	0.309203	0.469283	1.76105	2.49922		H3K9ac	0.504216	1.48506	1.36155	1.05812		H3K9ac	1.72095	0.34189	0.37169	2.34975
	H3K27ac	0.619351	0.677172	0.279234	1.28087		H3K27ac	0.729603	0.383166	0.636166	1.94949		H3K27ac	0.383803	2.23266	0.120209	0.517956		H3K27ac	0.331807	2.2045	0.280913	0.875235
	H4ac	1.62375	0.589215	0.25563	3.67298		H4ac	0.36569	0.472331	0.26662	2.1447		H4ac	0.346489	1.28563	0.274351	1.72226		H4ac	1.1242	2.9724	0.272009	2.68854
	H3K27me3	2.54017	11.2262	0.0879138	0.177425		H3K27me3	3.16856	12.6306	1.07179	0.2963		H3K27me3	0.639144	2.16822	0.0518492	0.715305		H3K27me3	0.984514	5.87441	1.00274	0.402993
	H3K9me3	1.11495	1.9792	0.154238	1.10291		H3K9me3	1.41685	1.87309	0.635143	1.36461		H3K9me3	0.308869	0.493245	0.134676	0.358809		H3K9me3	0.432122	1.1807	0.393201	0.733691
	twi	w	gd7	Tollrm9/10	Toll10B		sna	w	gd7	Tollrm9/10	Toll10B		tld	w	gd7	Tollrm9/10	Toll10B		zen	w	gd7	Tollrm9/10	Toll10B
n	CBP	7	6	3	4		CBP	7	5	3	3		CBP	7	6	3	4		CBP	7	6	3	4
	dl	3	4	2	3		dl	3	4	2	3		dl	4	4	2	3		dl	4	4	2	3
	H3K18ac	5	4	2	3		H3K18ac	5	4	2	3		H3K18ac	5	4	2	3		H3K18ac	5	4	2	3
	H3K9ac	2	3	2	4		H3K9ac	2	3	2	4		H3K9ac	2	3	2	4		H3K9ac	2	3	2	4
	H3K27ac	4	5	2	4		H3K27ac	4	5	2	4		H3K27ac	4	5	2	4		H3K27ac	4	5	2	4
	H4ac	3	3	2	3		H4ac	3	3	2	3		H4ac	3	3	2	3		H4ac	3	3	2	3
	H3K27me3	3	2	2	3		H3K27me3	3	2	2	3		H3K27me3	3	2	2	3		H3K27me3	3	2	2	3
	H3K9me3	3	3	2	3		H3K9me3	3	3	2	3		H3K9me3	3	3	2	3		H3K9me3	3	3	2	3
